# Supplementary material for: Pediatric Encephalopathy: Clinical, Biochemical and Cellular Insights into the Role of Gln52 of GNAO1 and GNAI1 for the Dominant Disease
Source: MDPI journal article supplement (doi:10.3390/cells10102749), 2021-10-14
Supplement: s1 [file s1]

# Pediatric encephalopathy: clinical, biochemical and cellular insights into the role of Gln52 of *GNAO1* and *GNAI1* for the dominant disease

Supplementary Materials for the article contain: Supplementary Table S1, Supplementary Figures S1 and S2.

Supplementary Table S1. Description of the patient with the *GNAO1* Gln52Arg variant, age progression.

|                                          | 1.5 weeks-2 months                                                                                                                    | 8 months                                                                | 32 months                                          |
|------------------------------------------|---------------------------------------------------------------------------------------------------------------------------------------|-------------------------------------------------------------------------|----------------------------------------------------|
| Neurological examination/<br>development | Axial hypotonia                                                                                                                       | Severe developmental delay<br>with axial hypotonia, poor eye<br>contact | Severe developmental delay, sleep<br>disturbance   |
| Seizures                                 | Focal , facial clonia and hyperemia and<br>tonic                                                                                      | Focal seizure: starring and loss<br>of contact                          | Epileptic spasms                                   |
| EEG                                      | Multifocal epileptiform activity                                                                                                      | Background rhythm slow down                                             | Multifocal epileptiform activity                   |
| Involuntary Movement                     | Dystonia in limbs                                                                                                                     | Dystonia, stereotypia                                                   | Dystonia, bruxism, spasm.<br>Abnormal motor skills |
| Seizure control                          | -                                                                                                                                     | Refractory                                                              | -                                                  |
| Anti-seizure medication                  | Valproic acid, diazepam. Dexamethasone<br>to suppress burst patterns as seen on<br>EEG                                                | Valproic acid and levetiracetam                                         | Valproic acid and levetiracetam.                   |
| Brain MRI                                | Enlarged subarachnoid spaces and<br>ventricles. Left posterior periventricular<br>nodular heterotopia (PVNH). Hypersignal<br>of PLICs |                                                                         | PVNH, Myelination delay                            |

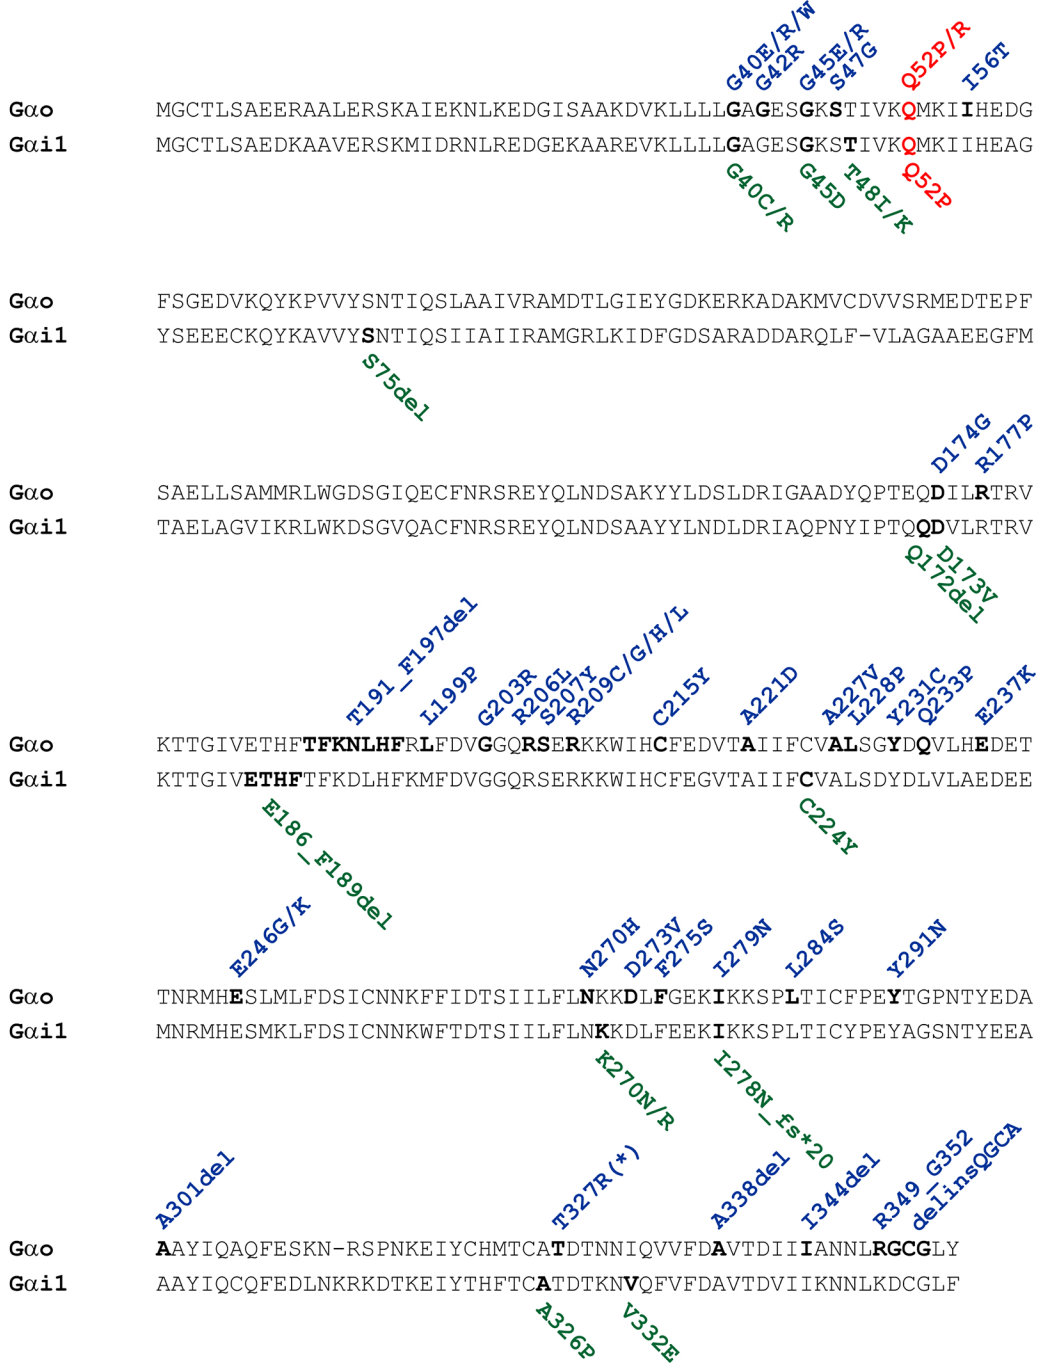

**Supplementary Figure S1.** Alignment of the amino acid sequences of Gao (isoform 1) and Gai1. Mutations reported in *GNAO1/GNAI1* pediatric encephalopathies are shown (the T327R mutation marked with a star causes a speech disorder but not encephalopathy). The mutations in the position Gln52 studied in this work are shown in red.

**A** In the patient, the **heterozygous chr16:56226522 A>G mutation in *GNAO1*** is revealed.

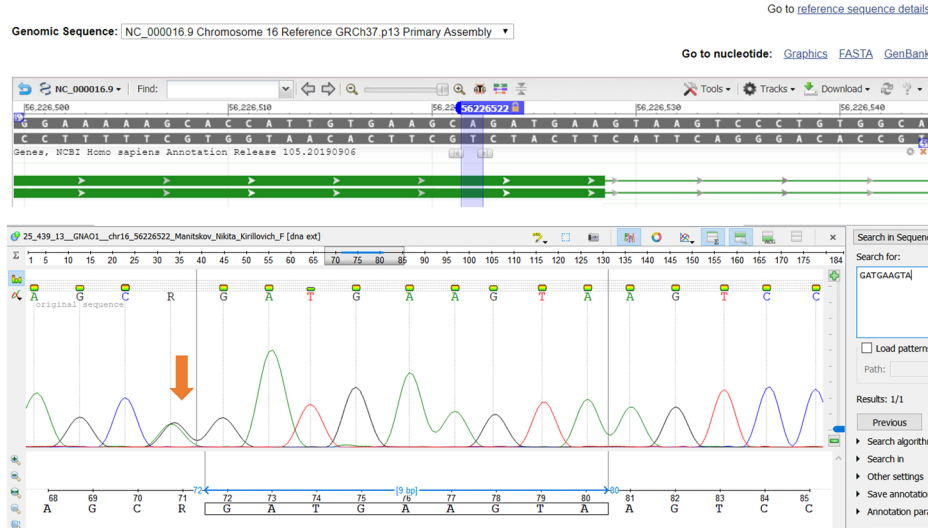

Forward reading, good quality, **reveals the heterozygous mutation.**

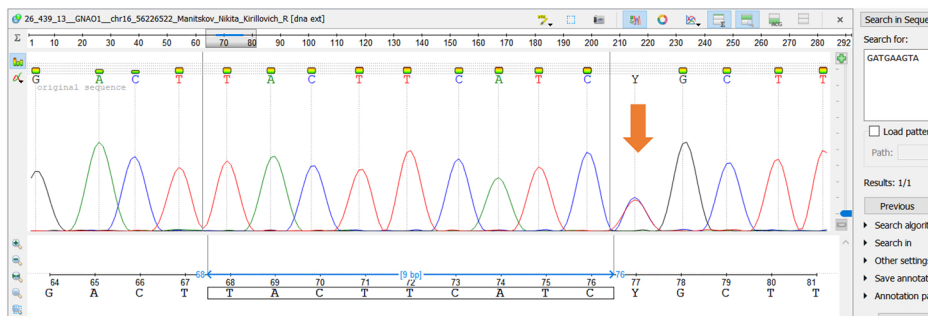

Reverse reading, good quality, **reveals the heterozygous mutation.**

**B**

In the patient's **mother**, the chr16:56226522 A>G mutation in *GNAO1* is not revealed.

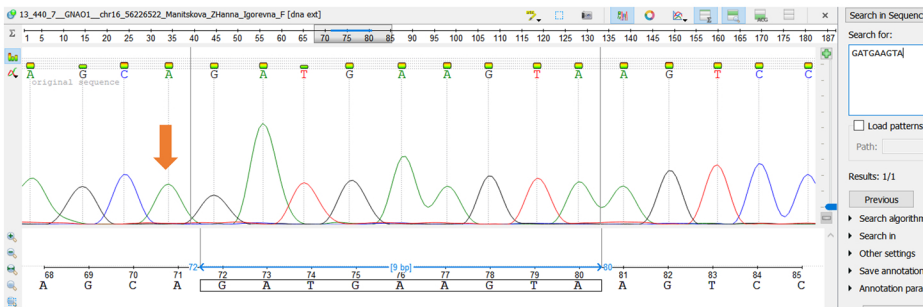

Forward reading, good quality, does not reveal the mutation.

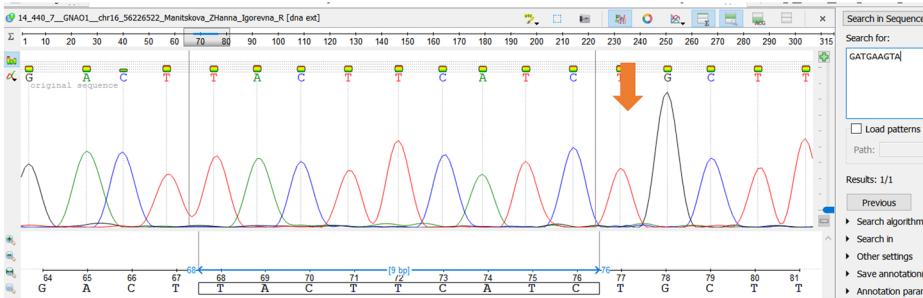

Reverse reading, good quality, does not reveal the mutation.

**C**

In the patient's **father**, the chr16:56226522 A>G mutation in *GNAO1* is not revealed.

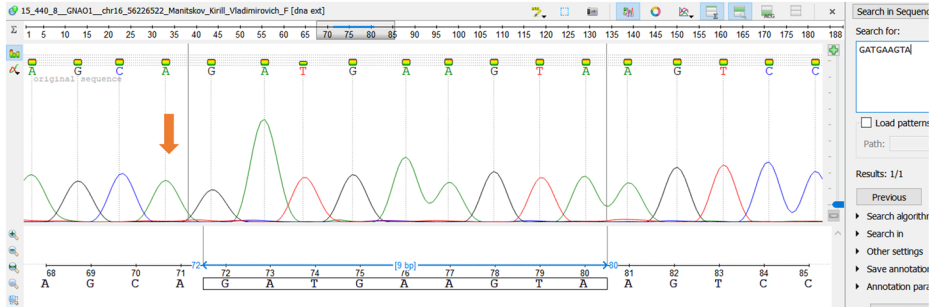

Forward reading, good quality, does not reveal the mutation.

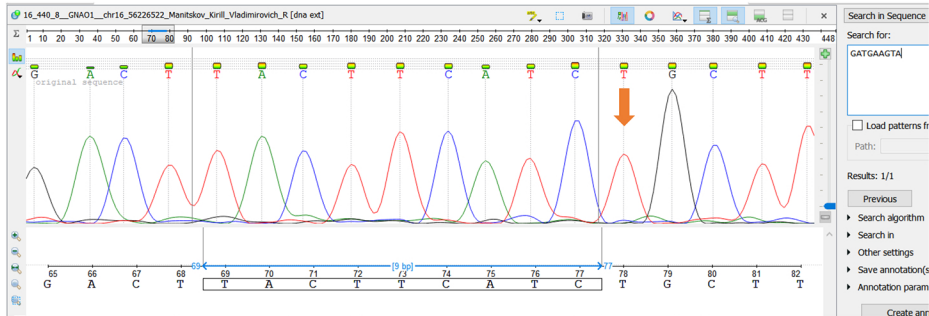

Reverse reading, good quality, does not reveal the mutation.

**Supplementary Figure S2.** Sanger sequencing of the pediatric encephalopathy patient and his parent reveals a heterozygous chr16:56226522 A>G mutation in *GNAO1* (A), absent in his mother (B) and father (C). Each sequencing is presented with a forward (upper panels) and reverse (lower panels) readings. Note that no signs of mosaicism in the chr16:56226522 A>G mutation can be seen in the electropherogram in (A).
